# Supplementary material for: Metabolomic analysis of uterine serous carcinoma with acquired resistance to paclitaxel
Source: PubMed Central journal article supplement (PMC6112827; doi:10.18632/oncotarget.25868), 2018-08-10
Supplement: oncotarget-09-31985-s001.pdf [file oncotarget-09-31985-s001.pdf]

## Metabolomic analysis of uterine serous carcinoma with acquired resistance to paclitaxel

### SUPPLEMENTARY MATERIALS

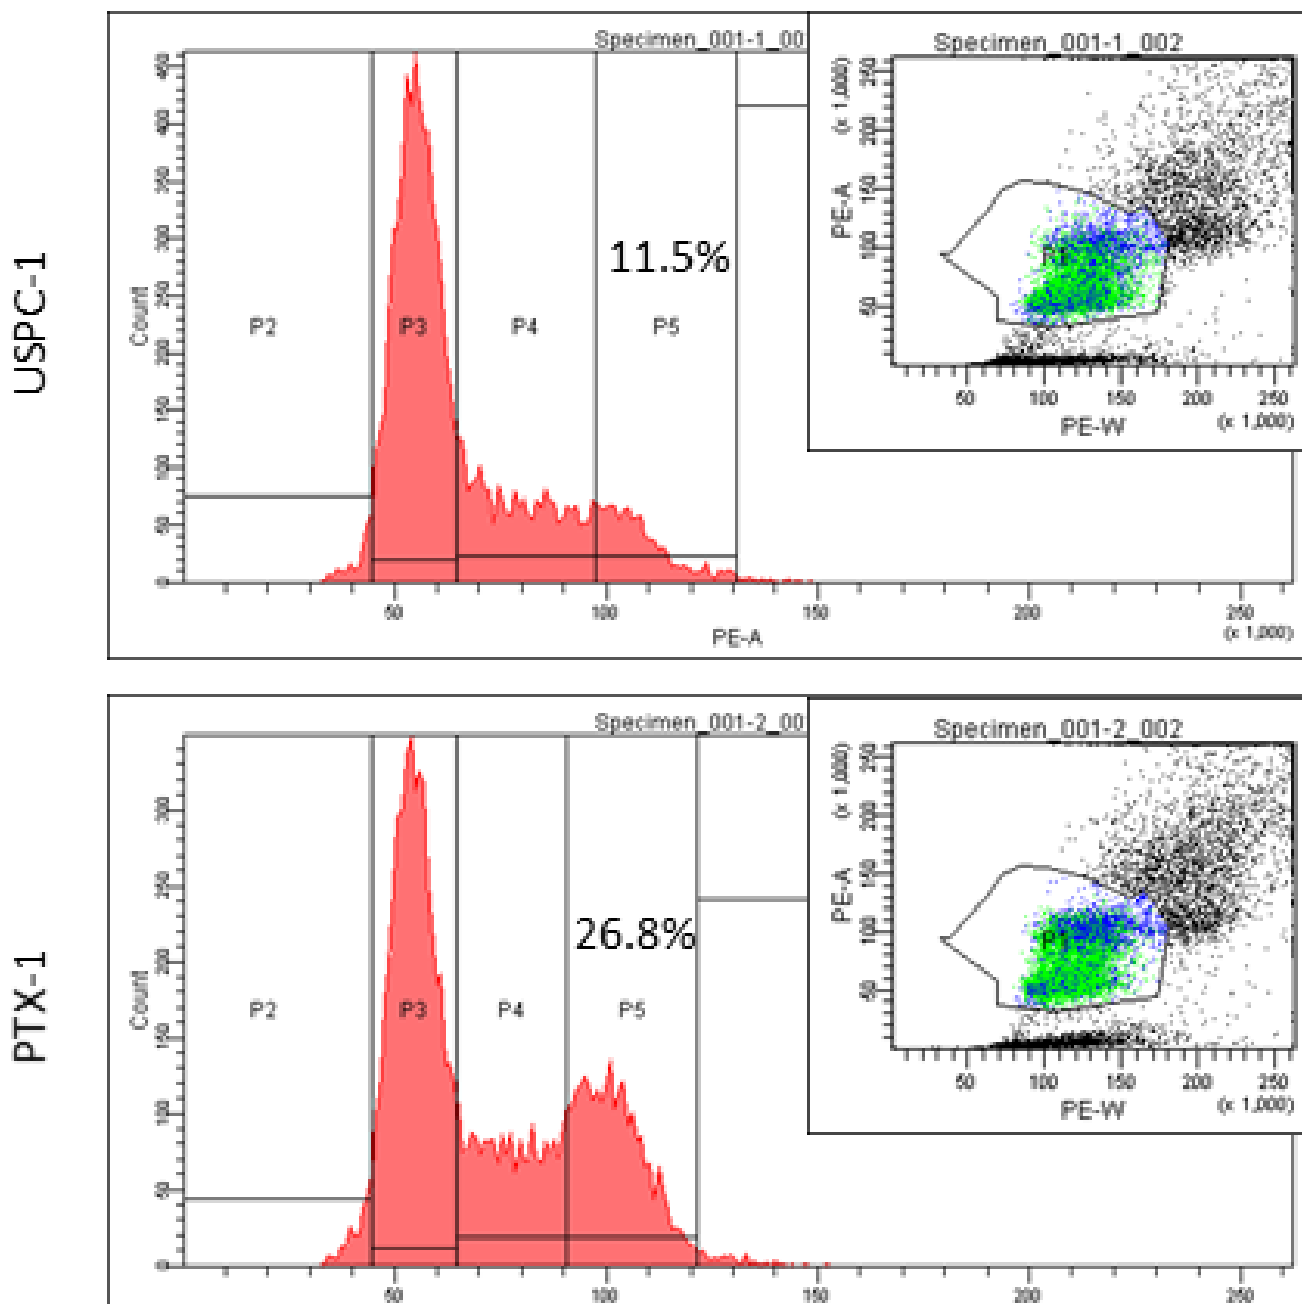

**Supplementary Figure 1: Cell cycle analysis in uterine serous carcinoma cells.** USPC-1 and PTX-1 cells were subjected to flowcytometric analysis. Representative histograms with the proportion of the cell population in the G2/M phase in USPC-1 and PTX-1 cells are shown.
